# Supplementary material for: CuMV VLPs Containing the RBM from SARS-CoV-2 Spike Protein Drive Dendritic Cell Activation and Th1 Polarization
Source: MDPI journal article supplement (doi:10.3390/pharmaceutics15030825), 2023-03-02
Supplement: s1 [file s1]

## Supplementary Material

Supplementary Table S1: Primer sequences for studied genes

| Gene Symbol  | Batch      | 5'-3'sequence<br>F: forward; R:reverse |
|--------------|------------|----------------------------------------|
| <i>TBP</i>   | HA12823724 | F: GCCAAGAGTGAAGAACAG                  |
|              | HA12823725 | R: GAAGTCCAAGAAGCTTAGCTG               |
| <i>IL6</i>   | HA14200417 | F: GCAGAAAAAGGCAAAGAATC                |
|              | HA14200418 | R: CTACATTTGCCGAAGAGC                  |
| <i>IL10</i>  | HA14200419 | F: GCCTTTAATAAGCTCCAAGAG               |
|              | HA14200420 | R: ATCTTCATTGTCATGTAGGC                |
| <i>IL15</i>  | HA14200381 | F: AGCAATGTTCCATCATGTTC                |
|              | HA14200382 | R: ATACGATCTTGTATGGGCTG                |
| <i>IL18</i>  | HA14200383 | F: CCTTTAAGGAAATGAATCCTCC              |
|              | HA14200384 | R: CATCTTATTATCATGTCCTGGG              |
| <i>IL12A</i> | HA14200377 | F: AAGACCTCTTTTATGATGGC                |
|              | HA14200378 | R: CATTCATGGTCTTGAAGTCC                |
| <i>IL12B</i> | HA14200379 | F: AGAAAAGATAGAGTCTTCACGG              |
|              | HA14200380 | R: AAGATGAGCTATAGTAGCGG                |
| <i>IL1β</i>  | HA14200415 | F: CTAAACAGATGAAGTGCTCC                |

|              |            |                           |
|--------------|------------|---------------------------|
|              | HA14200416 | R: GGTCATTCTCCTGGAAGG     |
| <i>CXCR4</i> | HA14200409 | F: AACTTCAGTTTGTGGCTG     |
|              | HA14200410 | R: GTGTATATACTGATCCCCTCC  |
| <i>CCR7</i>  | HA14200399 | F: TTGTCATTTTCCAGGTATGC   |
|              | HA14200400 | R: AATGATGGAGTACATGATAGGG |
| <i>CCL22</i> | HA14200425 | F: GTGGTGTTGCTAACCTTC     |
|              | HA14200426 | R: GGCTCAGCTTATTGAGAATC   |
| <i>TGFβ</i>  | HA14200407 | F: AACCCACAACGAAATCTATG   |
|              | HA14200408 | R: CTTTTAACTTGAGCCTCAGC   |
| <i>TNFα</i>  | HA14200429 | F: AGGCAGTCAGATCATCTTC    |
|              | HA14200430 | R: TTATCTCTCAGCTCCACG     |
| <i>iNOS</i>  | HA14364086 | F: CATCAACCAGTATTATGGCTC  |
|              | HA14364087 | R: TTCCTTTGTTACAGCTTCC    |
